# Supplementary material for: βA3/A1-crystallin is a critical mediator of STAT3 signaling in optic nerve astrocytes
Source: PubMed Central journal article supplement (PMC4348628; doi:10.1038/srep08755), 2015-03-04
Supplement: srep08755-s1.pdf [file srep08755-s1.pdf]

$\beta$ A3/A1-crystallin is a critical mediator of STAT3 signaling in optic nerve astrocytes

Mallika Valapala<sup>1</sup>, Malia Edwards<sup>1</sup>, Stacey Hose<sup>1</sup>, Jianfei Hu<sup>1</sup>, Eric Wawrousek<sup>2</sup>,  
Gerard A. Luty<sup>1</sup>, J. Samuel Zigler, Jr.<sup>1</sup> Jiang Qian<sup>1</sup> and Debasish Sinha<sup>1\*</sup>

<sup>1</sup>Wilmer Eye Institute, The Johns Hopkins University School of Medicine,  
Baltimore, Maryland 21287, USA,

<sup>2</sup>National Eye Institute, National Institutes of Health, Bethesda, Maryland 20892 , USA.

\*Corresponding Author:

Debasish Sinha

The Wilmer Eye Institute

The Johns Hopkins University School of Medicine

Baltimore, MD 21287

410-502-2100 (tel)

410-614-6728 (fax)

[Debasish@jhmi.edu](mailto:Debasish@jhmi.edu)
